# Supplementary material for: Lymphatic Phenotype of Noonan Syndrome: Innovative Diagnosis and Possible Implications for Therapy
Source: MDPI journal article supplement (doi:10.3390/jcm11113128), 2022-05-31
Supplement: s1 [file s1]

## Standard scoring system

Protocol scan in which 25G spinal needles are placed in the inguinal lymph nodes under ultrasound guidance, then scanned before and XX minutes after start of intranodal gadolinium injection.

Score van lymfe afwijkingen:

### Symptom / complaint / reason for referral (multiple answers possible)

Chylothorax

Ascites

Lymphedema (Location)

Genital swelling and leakage

Protein losing enteropathy

Plastic bronchitis

Chylopericard

Chylurie

Others,....

### Fluid location (oedema, fluid collection) on MRI (multiple answers possible)

-pleural fluids

left / right

little / moderate / large amount

-pericardial fluid

little / moderate / large amount

-ascites

little / moderate / large amount

-retroperitoneal

little / moderate / large amount

-mesenterial edema

little / moderate / large amount

-scrotal

little / moderate / large amount

-edema subcutan

Neck / right arm / left arm / right leg / left leg / scrotal / abdominal wall

-others..

-unknown

### Cysts (multiple answers possible) [intended as an indication of GLA generalized lymphatic anomaly]

-in bone

Vertebra / rib / pelvis / long bone / other ..

-neck

-mediastinal

-liver

-spleen

-kidney

-pancreas

- retroperitoneal

-mesenterial

-right neck / arm / armpit

-left neck / arm / armpit

-right leg / groin

-left leg / groin

-other,

-unknown

### Lymphatic tracts with contrast

-Unable to assess because no contrast has arrived (technical reason)

-iliac left

Absent / thin or little / normal / ectatic

Not judgeable

-iliac right

Absent / thin or little / normal / ectatic

Not judgeable

- retroperitoneal

Absent / thin or little / normal / ectatic

Not judgeable

-cisterna chyli

Not judgeable

absent / present

Maximum cross section

-Thoracic duct

Not judgeable

Completely absent / partial aplasia / full length present

Normal Slim / Dilated / Tortuous, Ecstatic / Multiple

Cross-section at the diaphragm / at the top mediastum

-opening thoracic duct (multiple answers possible)

Not judgeable

Left subclavian / left jugular / right subclavian / right jugular

single / multiple

### Flow in central lymphatics

-not judgeable

-normal ante degree

-retro degree at this location (multiple answers possible)

In leg left / right /

dermal backflow abdominal wall left / right /

inguinal /scrotum /

mesentery / liver, periportal / lung, peribronchial /

mediast / pericardium

-extravasat contrast

Scrotum / vagina / retroperitoneum / abdominal cavity / pleural cavity / pericardium / mediast /

mesentery - intestinal lumen / ureter / other ....

### Further findings:

Conclusion:
